1 Cell-type specific patterned stimulus-independent neuronal activity in the *Drosophila* visual system during  
2 synapse formation

3  
4 Orkun Akin <sup>1,3,4,5,\*</sup>, Bryce T. Bajar <sup>1,4</sup>, Mehmet F. Keles <sup>2</sup>, Mark A. Frye <sup>2</sup>, S. Lawrence Zipursky <sup>1,\*</sup>

5  
6 1. Department of Biological Chemistry, Howard Hughes Medical Institute, David Geffen School of Medicine,  
7 University of California, Los Angeles, Los Angeles, CA 90095, USA

8 2. Department of Integrative Biology and Physiology, University of California, Los Angeles, Los Angeles, CA  
9 90095, USA

10 3. Current Affiliation: Department of Neurobiology, David Geffen School of Medicine, University of  
11 California, Los Angeles, Los Angeles, CA 90095, USA

12 4. These authors contributed equally.

13 5. Lead Contact

14  
15 \* Correspondence: [akin.orkun@gmail.com](mailto:akin.orkun@gmail.com), [lzipursky@mednet.ucla.edu](mailto:lzipursky@mednet.ucla.edu)

## 16 **Summary**

17 Stereotyped synaptic connections define the neural circuits of the brain. In vertebrates, stimulus-independent  
18 activity contributes to neural circuit formation. It is unknown whether this type of activity is a general feature of  
19 nervous system development. Here, we report patterned, stimulus-independent neural activity in the *Drosophila*  
20 visual system during synaptogenesis. Using *in vivo* calcium, voltage, and glutamate imaging, we found that all  
21 neurons participate in this spontaneous activity, which is characterized by brain-wide periodic active and silent  
22 phases. Glia are active in a complementary pattern. Each of the 15 examined of the over 100 specific neuron  
23 types in the fly visual system exhibited a unique activity signature. The activity of neurons that are synaptic  
24 partners in the adult was highly correlated during development. We propose that this cell type-specific activity  
25 coordinates the development of the functional circuitry of the adult brain.

## 26 **Keywords**

27 Nervous system development, visual system development, neuronal activity, synaptogenesis, calcium imaging,  
28 2-photon microscopy.

## 29 **Introduction**

30  
31  
32 Synaptic connections between neurons determine how neural circuits process information.  
33 Understanding how the specificity of these connections is established is a central challenge in neurobiology. In  
34 vertebrates, cell autonomous genetic programs and neural activity—both evoked and spontaneous—contribute  
35 to the development of synapses. Spontaneous activity has been observed throughout the developing central  
36 nervous system (CNS)—in the hippocampus (Ben-Ari et al., 1989), spinal cord (Landmesser and O'Donovan,  
37 1984), cerebellum (Watt et al., 2009), auditory system (Tritsch et al., 2007), and visual system (Galli and  
38 Maffei, 1988; Meister et al., 1991). Retinal waves were discovered over 20 years ago and are the best  
39 characterized examples of spontaneous activity (reviewed in Ackman and Crair, 2014; Blankenship and Feller,  
40 2009; Kirkby et al., 2013; Sernagor and Hennig, 2013). In mice and other mammalian models, retinal waves  
41 begin soon after the completion of axon guidance and persist through eye opening. During this period, bursts of  
42 activity propagate from the retina to higher visual centers, including the lateral geniculate nucleus (LGN), the  
43 superior colliculus (SC), and the visual cortex (Ackman et al., 2012). In each of these areas, large populations of  
44 neighboring cells exhibit correlated firing patterns. Significant progress has been made toward characterizing  
45 and identifying the organizing principles of spontaneous activity in the developing vertebrate brain, and the  
46 precise developmental role of this activity is an area of active interest.

47 By contrast to vertebrates, brain development in invertebrates is thought to be driven by hardwired  
48 morphogenetic programs driven by cell recognition molecules, with little role for spontaneous or experience-  
49 dependent neural activity. Previous work has shown that, in the *Drosophila* visual system, photoreceptor

50 neurons can develop the wild-type complement of synapses in a stimulus-independent manner (Hiesinger et al.,  
51 2006). However, the existence and significance of spontaneous activity during invertebrate brain development  
52 remains an open question.

53 Some of the most detailed understanding of brain development in the fly comes from the visual system.  
54 Visual information from the compound eye is relayed in a topographic fashion to the optic neuropils—the  
55 lamina, medulla, and the lobula complex. These neuropils are organized into columns and layers. In general,  
56 columns process information from different points in visual space, and layers process different types of visual  
57 information. Over 100 different neuronal cell types form precise synaptic connections, typically with several  
58 different cell types. The three dimensional EM re-constructions of the optic neuropils that reveal this wiring  
59 complexity (Rivera-Alba et al., 2011; Takemura et al., 2013, 2017) also underscore the challenge of  
60 understanding the mechanisms of synaptic specificity: Most neurons make synapses with only a subset of their  
61 contact neighbors, and the area of contact has little bearing on this decision.

62 Visual system development in the fly takes place during the last stage of larval development and the  
63 ensuing 100 hours of metamorphosis, or pupal development. Synapse formation, as well as axon guidance and  
64 morphogenesis, are predicated on cell-cell contacts. As such, much of the focus in the study of neural  
65 development has been on the roles of cell surface and recognition molecules. This body of work, carried out at  
66 the level of individual cell types, paints the picture of a dynamic self-assembly process in which local  
67 interactions shape the developmental trajectory of each neuron (Hadjieconomou et al., 2011; Huang et al., 1998;  
68 Pecot et al., 2014). By 50 hours after pupa formation (hAPF), these specific and genetically hardwired  
69 molecular push-pulls bring most of the cell types of the visual system to where they belong in the adult brain,  
70 ready for synaptogenesis. Over the remaining 50 hours of pupal development, synapse assembly proceeds in  
71 parallel with notable changes in gene expression, including the upregulation of genes involved in neural activity  
72 and new sets of cell recognition molecules (Chen et al., 2014; Tan et al., 2015; Zhang et al., 2016). It is during  
73 this time that vast networks are assembled, comprising distant cells which must be linked through specific  
74 synaptic connections and compatible gene expression profiles (e.g. matching neurotransmitter systems and  
75 receptors). Little is known about the molecules and mechanisms that coordinate this period of brain  
76 development.

77 Here we report the discovery of stimulus-independent neural activity in the developing *Drosophila* CNS  
78 and its initial characterization in the visual system. We find that the visual system as a whole, all 15 of the  
79 individual neuronal cell types examined, as well as astrocytic glia, participate in patterned, stimulus-  
80 independent neural activity (PSINA), during the late stages of circuit assembly. We speculate on the function of  
81 this globally organized, cell type-specific activity in regulating the development of the connectome.

## 83 **Results**

## 84 **Patterned neuronal and glial activity in the developing fly brain**

85 To assess whether neural activity contributes to visual system development in *Drosophila*, we used an *in*  
86 *vivo* 2-photon live imaging protocol that enables continuous observation over several days (i.e. from ~16 hrs  
87 after puparium formation (hAPF) to eclosion) (Akin and Zipursky, 2016; Langen et al., 2015). We expressed  
88 the genetically-encoded calcium indicator (GECI) GCaMP6s (Chen et al., 2013) throughout the central nervous  
89 system using a pan-neuronal GAL4 driver. Between 40 and 50 hAPF, the optic lobe is largely inactive, aside  
90 from sporadic activity in isolated cells or groups of cells with no discernable spatial or temporal coordination  
91 (**Movie S1**). Starting shortly before 50 hAPF, a subset of neuronal processes begins to exhibit periodic pulse  
92 trains of increased fluorescence. By 55 hAPF, neuronal processes in all optic neuropils, as well as fibers  
93 originating from the central brain, participate in regular 12-15 minute long cycles of active and silent phases  
94 (**Figures 1A-1B, Movie S1**).

95 The active phase of each cycle comprises several distinct bouts of activity, each of which may have one  
96 or a set of closely spaced peaks (**Figure 1B**). We term these bouts *sweeps*. Between 55 and 65 hAPF, the cycle  
97 period remains roughly constant while the number of sweeps per cycle and the duration of the active phase  
98 increase at the expense of a shrinking silent phase (**Figure 1C**). Fourier analysis captures the simple periodicity  
99 of the activity pattern with a single dominant band for the cycle frequency (~0.001-0.002 Hz) over what we call  
00 the *periodic stage* (**Figure 1C**). There were no significant differences between periodicity, sweeps per cycle,  
01 active and silent phase durations between different animals, consistent with the notion that the developmental  
02 mechanisms underlying these metrics are stereotyped (**Figure S1A**).

03 To further characterize the time evolution of the neuronal activity, we moved our expression system to  
04 the *cn,bw* genetic background (Thimann and Beadle, 1937), which eliminated pigmentation in the retina and  
05 allowed us to image through eclosion. We found no significant differences in the periodic stage activity metrics  
06 between *cn,bw* flies and control flies (**Figure S1A**). Imaging beyond this stage revealed that by 70 hAPF the  
07 earlier, simple temporal pattern is replaced with multiple frequencies reflecting cycles with variable periods  
08 (**Figure 1D, Movie S1**). Compared to the periodic stage, during this later, *turbulent stage*, individual cycles  
09 exhibit higher sweeps per cycle, and, on average, longer and shorter active and silent phase durations,  
10 respectively (**Figure 1D**). The turbulent stage persists until the final hour of pupal development, after which the  
11 number and amplitude of peaks drop before eclosion (**Figure S1B**). Thus, activity during development is  
12 divided into an early periodic stage and a later turbulent stage, and continues until an hour before the adult fly  
13 emerges (**Figure 1E**).

14 We next asked whether activity was present beyond the visual system. Recently, a detailed study of  
15 motoneuron development showed that the neurons of the peripheral nervous system exhibit periodic bouts of  
16 activity, starting at 48 hAPF, which grow stronger as development proceeds (Constance et al., 2018). In pupae,  
17 the pan-neuronally driven GCaMP6s was sufficiently bright to detect using a wide field-of-view

18 epifluorescence microscope, making it possible to image the whole CNS of multiple animals simultaneously.  
19 We used this alternative preparation to follow the GECI signal between 58 and 60 hAPF, and observed cycles  
20 of activity that matched our observations from the 2-photon setup in both the optic lobes and the central brain  
21 (**Figure 2A, Movie S2**). We also established that the pattern of activity is the same in males and females  
22 (**Figure S2A**).

23 Given the broad domain of the activity, we assessed whether the glial complement of the CNS also  
24 participate in this process. Using orthogonal expression systems, we expressed GCaMP6s in astrocytic glia and  
25 RCaMP1b in all neurons (**Figures 2B, S2B-D**). Prior to 55 hAPF, there is no significant correlation between the  
26 glial GECI signal and neuronal activity (**Figure S2B**). This changes markedly further into the periodic stage  
27 when the glial signal begins periodic oscillations (**Figures 2B and S2C**). While, by contrast to the rapid  
28 neuronal responses, the changes to the glial GECI signal are tonic, these cells also cycle through periods of high  
29 and low intensity alongside neurons, albeit with a notable phase shift: when neurons are active, astrocytes  
30 exhibit a progressive loss in GECI signal which is rebuilt during the neuronal silent phase (**Figures 2B and**  
31 **S2D**).

32 As flies leave the field of view of the microscope upon eclosion, it was not possible to establish whether  
33 the oscillatory activity ceases altogether in the adult. To address this question, we used a head-fixed cranial  
34 window preparation of adult flies expressing GCaMP6s pan-neuronally (Aptekar et al., 2015; Seelig et al.,  
35 2010). We observed stimulus-independent activity in newly eclosed (1 hr old) flies as well as 1- and 5-day old  
36 adults, all of which also had intact, robust responses to visual stimuli (**Figure S3A**). By contrast to what we  
37 observe during development, spontaneous activity in the adult did not engage the entire optic lobe, exhibited  
38 fewer sweeps in a given cycle and oscillated at a higher frequency (**Figure S3B**). Further, with increasing age,  
39 less activity was observed, suggesting that the mechanisms driving this regime of activity decreased over a  
40 period of days. These differences suggest the involvement of different molecules and mechanisms in generating  
41 the pupal and adult stimulus-independent activities.

### 43 **Calcium activity correlates with changes in membrane voltage and neurotransmitter release and is** 44 **independent of visual stimulus**

45 The clear separation between stimulus-dependent and spontaneous GECI signals in the adult, and the  
46 interpretation of the former as evoked neuronal activity, raises two questions about the pulses observed during  
47 metamorphosis. First, are the pulses we observe during development reporting the electrical excitation across  
48 neurons, or rather are they indicative of membrane activity-independent modulation of intracellular calcium  
49 levels? And second, if the pupal pulses in the visual system do indeed reflect neuronal activity, do they depend  
50 on visual stimuli and phototransduction?

51 To address whether the pupal pulses reflect neuronal activity, we first asked if the GECI signal is  
52 accompanied by temporally matched neurotransmitter (e.g. glutamate) release and changes in membrane  
53 voltage by co-expressing the red-shifted GECI, RCaMP1b (Dana et al., 2016), with either the genetically  
54 encoded glutamate sensor iGluSnFR (Marvin et al., 2013) or the genetically encoded voltage indicator ArcLight  
55 (Jin et al., 2012). Pan-neuronal co-expression of both indicator pairings revealed glutamate release and  
56 membrane voltage dynamics that were closely correlated with the GECI signal cycles (**Figures S4A-B**). As  
57 discussed below, all neuronal cell types we studied individually also display the same GECI reported activity  
58 pattern we describe for pan-neuronal expression. As such, we constrained the source of the co-expressed  
59 indicators to a single cell type, the L1 lamina monopolar neuron, a glutamatergic first-order interneuron (Gao et  
60 al., 2008; Takemura et al., 2011). With L1, we observed strong correlation between the GECI signal and both  
61 the iGluSnFR-reported glutamate release (**Figure 2C, Movie S3**) and ArcLight-reported drops in membrane  
62 voltage (**Figures 2D, Movie S4**) at the level of individual sweeps.

63 To further examine the nature of the pupal pulses, we used the head-fixed cranial window preparation in  
64 late stage pupae (90-95 hAPF) to enable pharmacological manipulations. We found that on-going calcium  
65 activity at this stage is severely attenuated with the administration of tetrodotoxin, a voltage-gated sodium  
66 channel blocker that inhibits action potentials (**Figures 2E and S4C**). Together, these results indicate that the  
67 GECI signal observed during pupal development reflects neuronal electrical activity.

68 Next, we assessed the contribution of visual stimulus to developmental neuronal activity by following  
69 the GECI signal in *norpa*<sup>null</sup> animals. *Norpa* encodes phospholipase C, which is required in photoreceptors to  
70 initiate signaling downstream of rhodopsin, the light-activated G-protein coupled receptor (Bloomquist et al.,  
71 1988). We confirmed that *norpa*<sup>null</sup> animals are blind by testing the optomotor response to wide-field stimulus  
72 and closed-loop bar fixation (**Figure S5A-C**). Returning to our calcium imaging preparation, we found that  
73 activity was still present during pupal development (**Figure 2F**), although the cycle period was altered (**Figure**  
74 **S5D**). The finding that this activity is independent of visual stimuli is consistent with the reported timing for the  
75 onset of photoreceptor light response at 82 hAPF, which is some 27 hours after the neuronal activity begins  
76 (Hardie et al., 1993). It is also consistent with our experimental setup in which the only light source is the  
77 pulsed IR laser used for 2-photon excitation, which is outside of the sensitivity spectrum of fly photoreceptors  
78 (Salcedo et al., 1999). We conclude that the pupal neuronal activity is independent of a visual stimulus. In the  
79 remainder of the text we refer to this phenomenon as patterned, stimulus-independent neuronal activity, or  
80 PSINA. Taken together, our observations indicate that PSINA is a globally coordinated process that involves  
81 the entire developing CNS.

## 83 Cell type-specific dynamics of PSINA



84 We returned to 2-photon imaging of the developing visual system to assess PSINA in specific neuronal  
85 types. Using GCaMP6s, we followed calcium activity in 15 cell types, representing some of the major visual  
86 system classes (i.e. photoreceptors (R7, R8), lamina monopolar neurons (L1, L3, L5), medulla intrinsic neurons  
87 (Mi1, Mi4), distal medulla neurons (Dm3, Dm4, Dm9), transmedullary neurons (Tm3, Tm4, Tm9), and T  
88 neurons (T4, T5)) (**Figure 3A**). Between 50 and 65 hAPF, the temporal pattern of PSINA in all neurons closely  
89 followed the pan-neuronal archetype of the periodic stage; as a group, cells of a type cycled through active and  
90 silent phases lasting 12-15 minutes, starting around 50-55 hAPF and gradually increasing the duration and the  
91 sweep complement of the active phase over time (**Figure 3B**).

92 Whereas the broad temporal characteristics of PSINA are shared between all neuronal types, how the  
93 activity propagates across the repeated columnar array of a given cell type varies significantly. For example,  
94 nearly all L3 neurons participate in every sweep of an active phase while in L1s fractional participation can  
95 change notably between sweeps (**Figures 3C and 3D, Movie S5**). Further, during a sweep, L3s reach peak  
96 intensity within narrower time window compared to L1s (**Figures 3C and 3D**). In order to compare PSINA  
97 dynamics between repeated observations of the same cell type and across different cell types, we defined two  
98 scalar metrics, *coordination* and *coherence*, to represent the distributions of fractional participation and peak  
99 time spread values, respectively. Coordination is the fraction of sweeps with greater than 90% column  
00 participation. Coherence is the largest fraction of columns that peak within the same time point, averaged over  
01 all sweeps. Accordingly, distinct observations of PSINA in L3s all yield comparably high coordination and  
02 coherence values in contrast to L1, which scores consistently lower for both metrics (**Figure 3E**). We extended  
03 this analysis to 13 other cell types and found that coordination and coherence values from separate observations  
04 cluster around means characteristic to each cell type, independent of the specific drivers used for GECI  
05 expression or transgenic constitution of the animals (**Figures 3F and S6A, Movie S6**). For most cell types,  
06 coordination and coherence are roughly constant during the periodic stage, between 55-65 hAPF (**Figure S6B**).  
07 In the few that do show changes, we observe loss of coordination that is attributable to loss of image quality as  
08 developing retinal pigmentation degrades the observed GECI signal, particularly with weaker cell type-specific  
09 drivers. A notable exception is L1; here, despite the loss of net signal, both metrics increase over time (**Figure**  
10 **S6B**), indicating that the observed trends reflect evolving PSINA dynamics. Visual inspection of the L1 activity  
11 pattern over time confirms this conclusion (**Figures S6C-S6D**). In summary, we find that the fine spatio-  
12 temporal structure of PSINA is cell type-specific, stereotyped and can be dynamic over the course of  
13 development.

14 The cell type-specific diversity of PSINA dynamics suggested that the activity may be traversing the  
15 visual system through multiple parallel ‘channels’ which engage distinct sets of neurons. To explore this notion,  
16 we imaged pairs of neurons expressing red and green GECIs (**Figure 4**). For example, we compared the activity  
17 in Tm3 transmedullary neurons, with processes in both the medulla and the lobula neuropils, to the medulla-

18 resident dendrites of the T4 class and the lobula-resident dendrites of T5s (**Figures 4A-4D, Movie S7**).  
19 Between 55-65 hAPF, the Tm3-T4 activity was highly correlated ( $0.8\pm 0.06$ ,  $n=3$ ) while the Tm3-T5  
20 correlation was significantly lower ( $0.55\pm 0.1$ ,  $n=2$ ) (**Figures 4D-4E, S7A-S7B**). The results were the same  
21 when these measurements were repeated with the opposite cell type and color pairing (**Figure S7C**). Notably, in  
22 the adult, Tm3 and T4 are synaptic partners in the ON-motion circuit (Takemura et al., 2013) while T5, which is  
23 part of the OFF-motion circuit, is not a synaptic partner with Tm3 (Shinomiya et al., 2014).

24 Downstream of photoreceptors, L1 is considered to provide the principal input to the ON-motion circuit  
25 (Joesch et al., 2010), with Tm3 and Mi1 as its major post-synaptic partners, which then synapse with T4  
26 (Behnia et al., 2014; Takemura et al., 2013), the first direction selective neuron in the pathway (Maisak et al.,  
27 2014) (**Figure 3A**). We found that the activities of the Mi1-Tm3 and Mi1-T4 pairs are also well correlated  
28 while L1-Tm3 has lower correlation (**Figure 4E**). As discussed above, the dynamics of PSINA in L1 evolve  
29 through pupal development, and may eventually converge with a presumptive ON-motion PSINA channel  
30 during the ensuing turbulent stage. Alternatively, if PSINA is propagated through some form of synaptic  
31 coupling, the low L1-Tm3 correlation may be reporting on the sign of the interaction; that is, L1 could be an  
32 inhibitory synaptic partner at this stage of development.

33 Returning to T5, we found that its activity is highly correlated with Tm4, an OFF-motion circuit input  
34 into T5 in the adult (Serbe et al., 2016; Shinomiya et al., 2014) (**Figure 4E**). Finally, we observed highly  
35 correlated activity between a pair of high coordination-coherence cells, L3 and Dm4 (**Figure 4E**), which are  
36 also synaptic partners in the adult. Together, these results confirm the presence of multiple distinct channels of  
37 PSINA activity.

38 Correlated activity patterns between many adult synaptic partners some 45 hours before the end of pupal  
39 development hinted at the existence of an early form of synaptic pairing. To explore whether the observed  
40 correlations depend on synaptic release, we expressed tetanus toxin (TNT) in one cell type of a pair and  
41 measured the correlation of the PSINA activities as before. Driving TNT expression in Tm3s reduced the  
42 correlation of the Tm3-T4 pair significantly while the Tm3-T5 value was unaffected (**Figure 4F**). By contrast,  
43 T4 expression of TNT had no effect on the Tm3-T4 correlation (**Figure 4F**). These results indicate that the  
44 coordinated PSINA activity in Tm3 and T4 is dependent on synaptic release from Tm3, consistent with the  
45 notion that PSINA propagation is achieved through some form of synaptic coupling.

## 46 47 **Discussion**

48 In summary, here we report the discovery and initial characterization of PSINA in the developing fly  
49 visual system. We observe three distinct stages of PSINA: a periodic stage between 55 and 65 hAPF, a turbulent  
50 stage lasting from 70 hAPF to the final hour of pupal development, and an adult stage that persists alongside  
51 mature stimulus responses through at least the first four days following eclosion. During the periodic stage,



52 which coincides with the onset of synaptogenesis in the fly CNS (Chen et al., 2014; Muthukumar et al., 2014),  
53 each neuronal cell type of the 15 analyzed exhibited stereotyped and distinct activity patterns. Many adult  
54 synaptic partners had correlated activity, which depended on synaptic release.

55 Distinct periodic calcium dynamics were also seen in astrocytes. Astrocytes in the developing adult  
56 brain elaborate processes which infiltrate the neuropil during synapse formation (Muthukumar et al., 2014).  
57 Ablating astrocytes leads to a significant reduction in the total synapse count (32-47%, depending on the region)  
58 in the brain, supporting a role for these cells in regulating synaptogenesis (Muthukumar et al., 2014). Astrocytes  
59 of the optic neuropils also elaborate their processes over the same time period (Richier et al., 2017). Here we  
60 report that astrocytes exhibit cycles of GECI signal that are matched, though offset, to the periodic PSINA.  
61 These findings raise the possibility that astrocytes, spontaneous activity in them, and PSINA contribute to the  
62 formation, specificity, or maturation of synapses within the visual system.

63 What is the contribution of PSINA to building a brain? The best characterized system are retinal waves,  
64 which drive the activity of retinal ganglion cells (RGCs), the exclusive conduit of information from the eyes to  
65 the brain. Here, RGC projections from both eyes target the LGN and the SC, where they create retinotopic maps  
66 of the visual field and segregate based on the eye of origin. In the mouse, retinal waves are described in three  
67 stages: The gap-junction mediated stage I from embryonic day 17 (E17) to post-natal day 1 (P1), the  
68 ‘cholinergic’ stage II between P1-P10, and the ‘glutamatergic’ stage III from P10 to eye opening at P14  
69 (Blankenship and Feller, 2009; Sernagor and Hennig, 2013). Retinotopy and eye-specific segregation in the  
70 LGN and SC are refined over the same period as the second stage of retinal waves. This cholinergic stage is  
71 driven by starburst amacrine cells (SACs) (Zheng et al., 2006, 2004). Early work in the field established that  
72 pharmacological manipulation of spontaneous activity in the retina disrupts the organization of RGC projections  
73 in the LGN (Shatz and Stryker, 1988; Sretavan et al., 1988). Later studies, using progressively more refined  
74 methods, have shown that disrupting the cholinergic circuit of SACs and RGCs largely eliminates retinal waves  
75 and leads to defects in the refinement of retinotopy and eye-specific segregation of RGC projections (Bansal et  
76 al., 2000; Burbridge et al., 2014; McLaughlin et al., 2003; and others). In brief, retinal waves are necessary for  
77 the correct patterning of RGC projections in the brain.

78 Five classes of neurons comprise the retina: Photoreceptors, bipolar cells, amacrine cells, horizontal  
79 cells, and retinal ganglion cells (RGCs). The diversity of cell types within these classes—as many as 30 for  
80 RGCs (Sanes and Masland, 2015)—is comparable to the fly visual system. Whether there is cell type-specific  
81 texture to the retinal waves similar to PSINA described here is not known, although broad classes of RGCs and  
82 cone bipolar cells have been shown to exhibit temporally offset firing patterns (Akrouh and Kerschensteiner,  
83 2013; Kerschensteiner and Wong, 2008) With improving genetic handles for distinct retinal cell types and  
84 ongoing efforts at describing the high resolution connectome, it will be possible to explore cell type-specific  
85 patterns and the contribution of retinal waves to retinal circuitry (Seung and Sümbül, 2014).

86 In *Drosophila*, peristaltic contractions of body wall muscles have recently been appreciated as part of  
87 broad neuronal activity during embryonic development (Vonhoff and Keshishian, 2016). This activity is similar  
88 to PSINA observed during pupal development with respect to periodicity and timing relative to synapse  
89 formation and refinement. Preventing motor neurons from participating in this neuronal activity, or disrupting  
90 calcium-dependent intracellular signaling results in ectopic synapses (Carrillo et al., 2010; Jarecki and  
91 Keshishian, 1995; Vonhoff and Keshishian, 2016). In the wildtype, the calcium transients in motor neurons are  
92 thought to enable synaptic pruning in response to the muscle-derived chemorepellent Sema2a (Vonhoff and  
93 Keshishian, 2016). A similar link between spontaneous activity and axon guidance has also been demonstrated  
94 in the developing mammalian visual system. Here, oscillatory  $Ca^{2+}$  activity in RGCs were shown to be required  
95 for the ephrin-A5 dependent re-positioning of RGC projections in the SC in *ex vivo* cultures (Nicol et al., 2007).  
96 These observations from the fly and the mouse suggest that axon guidance and, more broadly, neuronal  
97 morphogenesis may be common effectors of spontaneous activity during brain development.

98 Based on the studies we reference here, previous studies in the fly visual system, and of the role of  
99 spontaneous activity in other systems, we propose a general conceptual framework for the role of PSINA in  
00 regulating the assembly of the adult connectome. Here, we provide evidence to suggest that some adult synaptic  
01 pairings are already established by 55 hAPF, soon after the first pre-synapses can be detected and co-incident  
02 with the onset of periodic PSINA. The global coordination of PSINA indicates that an early connectome, one  
03 that must be built without activity, is present at this time. This early connectome, comprising the processes of  
04 over 100 different neuronal cell types, would be built through local, largely contact-dependent biochemical  
05 interactions. While the level of organization achieved through such mechanisms is astonishing, the early  
06 connectome may still be a rough approximation of what is required in the adult. PSINA, by orchestrating  
07 cellular communication at temporal and spatial scales inaccessible to other signaling mechanisms, may be  
08 acting to refine this first draft to complete the self-assembly of the brain. Sweeps of activity repeatedly coursing  
09 through the brain through different ‘channels’ could link distinct sets of neurons to direct coordinated  
10 morphological changes and sculpt cell-cell contacts, strengthen synapses with correct targets while weakening  
11 and pruning incorrect pairings, and control transcription programs that direct circuit refinement (Lee et al.,  
12 2017; Nakashima et al., 2013; Serizawa et al., 2006; Tyssowski et al., 2018). PSINA may act as a ‘dress  
13 rehearsal’ for neural networks, preparing for ‘opening night’ at the completion of development. Individual cells  
14 know their own lines, with whom they interact, and their respective positions on the stage; however, repeated  
15 practice of each scene is necessary to refine interactions and ensure that each of the cast can perform as part of a  
16 whole ensemble.

17 We find it remarkable that as a process that appears to engage most, if not all, of the CNS, PSINA is the  
18 collective output of the genetically hardwired developmental programs of individual neurons. Thus, despite its  
19 complexity, the organizing principles, the driving forces, and the functional significance of PSINA at the level

of circuits, cells, and molecules should be discoverable through genetic analysis. Undertaking this effort in the fly visual system, where structures analogous to the vertebrate retinal plexiforms, the LGN, and the SC (Sanes and Zipursky, 2010) are compactly organized in a single microscopic field of view and for which the EM-derived connectome is available, may yield valuable insights into whether and how PSINA affects synaptic specificity and circuit maturation. We expect that the ever-expanding genetic toolkit of *Drosophila*, complemented with improvements in genomic/transcriptomic analysis and imaging technology, will offer a robust experimental track toward understanding PSINA's contribution to brain development and function.

## Acknowledgments

We thank Gerald M. Rubin, Barrett Pfeiffer, David J. Anderson, Yon-il Jung, Douglas Kim, Vivek Jaramayan, and Yi Sun for GCaMP6s and jRCaMP1b flies, and for technical advice. For assistance and advice with preliminary experiments, we thank Na Ji, Anderson Chen, and Rongwen Lu. For discussing unpublished results and providing feedback on our findings, we thank Kristin Scott, Chris Doe, Marla Feller, and Haig Keshishian. We thank members of the Zipursky Lab for their support and insights. This work was supported by NIH T32 GM008032 (BTB) and NIH R01-EY026031 (MAF), and Howard Hughes Medical Institute. SLZ is an investigator of the Howard Hughes Medical Institute.

## Contributions

BTB and SLZ conceived the original approach. OA, BTB, and SLZ developed the project. OA designed imaging and analysis protocols with assistance from BTB. OA and BTB collected and analyzed developmental imaging data. MFK and BTB collected and analyzed adult imaging and behavior data. OA, BTB, and SLZ wrote the paper. MAF and SLZ supervised the project.

## Declaration of Interests

The authors declare no competing interests.

## References

- 45  
46 Ackman, J.B., and Crair, M.C. (2014). Role of emergent neural activity in visual map development. *Curr. Opin.*  
47 *Neurobiol.* *24*, 166–175.
- 48 Ackman, J.B., Burbridge, T.J., and Crair, M.C. (2012). Retinal waves coordinate patterned activity throughout  
49 the developing visual system. *Nature* *490*, 219–225.
- 50 Akin, O., and Zipursky, S.L. (2016). Frazzled promotes growth cone attachment at the source of a Netrin  
51 gradient in the *Drosophila* visual system. *eLife* *5*.
- 52 Akrouh, A., and Kerschensteiner, D. (2013). Intersecting circuits generate precisely patterned retinal waves.  
53 *Neuron* *79*, 322–334.
- 54 Aptekar, J.W., Keles, M.F., Mongeau, J.-M., Lu, P.M., Frye, M.A., and Shoemaker, P.A. (2014). Method and  
55 software for using m-sequences to characterize parallel components of higher-order visual tracking behavior in  
56 *Drosophila*. *Front. Neural Circuits* *8*, 130.
- 57 Bansal, A., Singer, J.H., Hwang, B.J., Xu, W., Beaudet, A., and Feller, M.B. (2000). Mice lacking specific  
58 nicotinic acetylcholine receptor subunits exhibit dramatically altered spontaneous activity patterns and reveal a  
59 limited role for retinal waves in forming ON and OFF circuits in the inner retina. *J. Neurosci. Off. J. Soc.*  
60 *Neurosci.* *20*, 7672–7681.
- 61 Behnia, R., Clark, D.A., Carter, A.G., Clandinin, T.R., and Desplan, C. (2014). Processing properties of ON and  
62 OFF pathways for *Drosophila* motion detection. *Nature* *512*, 427–430.
- 63 Ben-Ari, Y., Cherubini, E., Corradetti, R., and Gaiarsa, J.L. (1989). Giant synaptic potentials in immature rat  
64 CA3 hippocampal neurones. *J. Physiol.* *416*, 303–325.
- 65 Blankenship, A.G., and Feller, M.B. (2009). Mechanisms underlying spontaneous patterned activity in  
66 developing neural circuits. *Nat. Rev. Neurosci.* *11*, 18–29.
- 67 Bloomquist, B.T., Shortridge, R.D., Schneuwly, S., Perdew, M., Montell, C., Steller, H., Rubin, G., and Pak,  
68 W.L. (1988). Isolation of a putative phospholipase C gene of *Drosophila*, *norpA*, and its role in  
69 phototransduction. *Cell* *54*, 723–733.
- 70 Brand, A.H., and Perrimon, N. (1993). Targeted gene expression as a means of altering cell fates and generating  
71 dominant phenotypes. *Development* *118*, 401–415.
- 72 Burbridge, T.J., Xu, H.-P., Ackman, J.B., Ge, X., Zhang, Y., Ye, M.-J., Zhou, Z.J., Xu, J., Contractor, A., and  
73 Crair, M.C. (2014). Visual Circuit Development Requires Patterned Activity Mediated by Retinal Acetylcholine  
74 Receptors. *Neuron* *84*, 1049–1064.
- 75 Carrillo, R.A., Olsen, D.P., Yoon, K.S., and Keshishian, H. (2010). Presynaptic Activity and CaMKII Modulate  
76 Retrograde Semaphorin Signaling and Synaptic Refinement. *Neuron* *68*, 32–44.
- 77 Chen, T.-W., Wardill, T.J., Sun, Y., Pulver, S.R., Renninger, S.L., Baohan, A., Schreiter, E.R., Kerr, R.A.,  
78 Orger, M.B., Jayaraman, V., et al. (2013). Ultrasensitive fluorescent proteins for imaging neuronal activity.  
79 *Nature* *499*, 295–300.
- 80 Chen, Y., Akin, O., Nern, A., Tsui, C.Y.K., Pecot, M.Y., and Zipursky, S.L. (2014). NeuroResource. *Neuron*  
81 *81*, 280–293.

- 82 Dana, H., Mohar, B., Sun, Y., Narayan, S., Gordus, A., Hasseman, J.P., Tsegaye, G., Holt, G.T., Hu, A.,  
83 Walpita, D., et al. (2016). Sensitive red protein calcium indicators for imaging neural activity. *eLife* 5.
- 84 Galli, L., and Maffei, L. (1988). Spontaneous impulse activity of rat retinal ganglion cells in prenatal life.  
85 *Science* 242, 90–91.
- 86 Gao, S., Takemura, S., Ting, C.-Y., Huang, S., Lu, Z., Luan, H., Rister, J., Thum, A.S., Yang, M., Hong, S.-T.,  
87 et al. (2008). The Neural Substrate of Spectral Preference in *Drosophila*. *Neuron* 60, 328–342.
- 88 Hadjieconomou, D., Timofeev, K., and Salecker, I. (2011). A step-by-step guide to visual circuit assembly in  
89 *Drosophila*. *Curr. Opin. Neurobiol.* 21, 76–84.
- 90 Hardie, R.C., Peretz, A., Pollock, J.A., and Minke, B. (1993). Ca<sup>2+</sup> limits the development of the light response  
91 in *Drosophila* photoreceptors. *Proc. Biol. Sci.* 252, 223–229.
- 92 Hiesinger, P.R., Zhai, R.G., Zhou, Y., Koh, T.-W., Mehta, S.Q., Schulze, K.L., Cao, Y., Verstreken, P.,  
93 Clandinin, T.R., Fischbach, K.-F., et al. (2006). Activity-Independent Prespecification of Synaptic Partners in  
94 the Visual Map of *Drosophila*. *Curr. Biol.* 16, 1835–1843.
- 95 Huang, Z., Shilo, B.Z., and Kunes, S. (1998). A retinal axon fascicle uses spitz, an EGF receptor ligand, to  
96 construct a synaptic cartridge in the brain of *Drosophila*. *Cell* 95, 693–703.
- 97 Jarecki, J., and Keshishian, H. (1995). Role of neural activity during synaptogenesis in *Drosophila*. *J. Neurosci.*  
98 *Off. J. Soc. Neurosci.* 15, 8177–8190.
- 99 Jin, L., Han, Z., Platasa, J., Woollorton, J.R.A., Cohen, L.B., and Pieribone, V.A. (2012). Single action  
00 potentials and subthreshold electrical events imaged in neurons with a fluorescent protein voltage probe.  
01 *Neuron* 75, 779–785.
- 02 Joesch, M., Schnell, B., Raghu, S.V., Reiff, D.F., and Borst, A. (2010). ON and OFF pathways in *Drosophila*  
03 motion vision. *Nature* 468, 300–304.
- 04 Keleş, M.F., and Frye, M.A. (2017). Object-Detecting Neurons in *Drosophila*. *Curr. Biol.* 27, 680–687.
- 05 Kerschensteiner, D., and Wong, R.O.L. (2008). A precisely timed asynchronous pattern of ON and OFF retinal  
06 ganglion cell activity during propagation of retinal waves. *Neuron* 58, 851–858.
- 07 Kirkby, L.A., Sack, G.S., Firl, A., and Feller, M.B. (2013). A Role for Correlated Spontaneous Activity in the  
08 Assembly of Neural Circuits. *Neuron* 80, 1129–1144.
- 09 Lai, S.-L., and Lee, T. (2006). Genetic mosaic with dual binary transcriptional systems in *Drosophila*. *Nat.*  
10 *Neurosci.* 9, 703–709.
- 11 Landmesser, L.T., and O’Donovan, M.J. (1984). Activation patterns of embryonic chick hind limb muscles  
12 recorded in ovo and in an isolated spinal cord preparation. *J. Physiol.* 347, 189–204.
- 13 Langen, M., Agi, E., Altschuler, D.J., Wu, L.F., Altschuler, S.J., and Hiesinger, P.R. (2015). The  
14 Developmental Rules of Neural Superposition in *Drosophila*. *Cell* 162, 120–133.
- 15 Lee, P.R., Cohen, J.E., Jacobas, D.A., Jacobas, S., and Fields, R.D. (2017). Gene networks activated by specific  
16 patterns of action potentials in dorsal root ganglia neurons. *Sci. Rep.* 7, 43765.



- 17 Maisak, M.S., Haag, J., Ammer, G., Serbe, E., Meier, M., Leonhardt, A., Schilling, T., Bahl, A., Rubin, G.M.,  
18 Nern, A., et al. (2014). A directional tuning map of *Drosophila* elementary motion detectors. *Nature* *500*, 212–  
19 216.
- 20 Marvin, J.S., Borghuis, B.G., Tian, L., Cichon, J., Harnett, M.T., Akerboom, J., Gordus, A., Renninger, S.L.,  
21 Chen, T.-W., Bargmann, C.I., et al. (2013). An optimized fluorescent probe for visualizing glutamate  
22 neurotransmission. *Nat. Methods* *10*, 162–170.
- 23 McLaughlin, T., Torborg, C.L., Feller, M.B., and O’Leary, D.D.M. (2003). Retinotopic map refinement  
24 requires spontaneous retinal waves during a brief critical period of development. *Neuron* *40*, 1147–1160.
- 25 Meister, M., Wong, R.O., Baylor, D.A., and Shatz, C.J. (1991). Synchronous bursts of action potentials in  
26 ganglion cells of the developing mammalian retina. *Science* *252*, 939–943.
- 27 Muthukumar, A.K., Stork, T., and Freeman, M.R. (2014). Activity-dependent regulation of astrocyte GAT  
28 levels during synaptogenesis. *Nat. Publ. Group* *17*, 1340–1350.
- 29 Nakashima, A., Takeuchi, H., Imai, T., Saito, H., Kiyonari, H., Abe, T., Chen, M., Weinstein, L.S., Yu, C.R.,  
30 Storm, D.R., et al. (2013). Agonist-independent GPCR activity regulates anterior-posterior targeting of  
31 olfactory sensory neurons. *Cell* *154*, 1314–1325.
- 32 Nicol, X., Voyatzis, S., Muzerelle, A., Narboux-Nême, N., Südhof, T.C., Miles, R., and Gaspar, P. (2007).  
33 cAMP oscillations and retinal activity are permissive for ephrin signaling during the establishment of the  
34 retinotopic map. *Nat. Neurosci.* *10*, 340–347.
- 35 Pecot, M.Y., Chen, Y., Akin, O., Chen, Z., Tsui, C.Y.K., and Zipursky, S.L. (2014). Sequential Axon-Derived  
36 Signals Couple Target Survival and Layer Specificity in the *Drosophila* Visual System. *Neuron* *82*, 320–333.
- 37 Reiser, M.B., and Dickinson, M.H. (2008). A modular display system for insect behavioral neuroscience. *J.*  
38 *Neurosci. Methods* *167*, 127–139.
- 39 Richier, B., de Miguel Vijandi, C., Mackensen, S., and Salecker, I. (2017). Lapsyn controls branch extension  
40 and positioning of astrocyte-like glia in the *Drosophila* optic lobe. *Nat. Commun.* 1–17.
- 41 Rivera-Alba, M., Vitaladevuni, S.N., Mishchenko, Y., Lu, Z., Takemura, S., Scheffer, L., Meinertzhagen, I.A.,  
42 Chklovskii, D.B., and de Polavieja, G.G. (2011). Wiring Economy and Volume Exclusion Determine Neuronal  
43 Placement in the *Drosophila* Brain. *Curr. Biol.* *21*, 2000–2005.
- 44 Salcedo, E., Huber, A., Henrich, S., Chadwell, L.V., Chou, W.H., Paulsen, R., and Britt, S.G. (1999). Blue- and  
45 green-absorbing visual pigments of *Drosophila*: ectopic expression and physiological characterization of the R8  
46 photoreceptor cell-specific Rh5 and Rh6 rhodopsins. *J. Neurosci.* *19*, 10716–10726.
- 47 Sanes, J.R., and Masland, R.H. (2015). The Types of Retinal Ganglion Cells: Current Status and Implications  
48 for Neuronal Classification. *Annu. Rev. Neurosci.* *38*, 221–246.
- 49 Sanes, J.R., and Zipursky, S.L. (2010). Design Principles of Insect and Vertebrate Visual Systems. *Neuron* *66*,  
50 15–36.
- 51 Schindelin, J., Arganda-Carreras, I., Frise, E., Kaynig, V., Longair, M., Pietzsch, T., Preibisch, S., Rueden, C.,  
52 Saalfeld, S., Schmid, B., et al. (2012). Fiji: an open-source platform for biological-image analysis. *Nat. Methods*  
53 *9*, 676–682.



- 54 Seelig, J.D., Chiappe, M.E., Lott, G.K., Dutta, A., Osborne, J.E., Reiser, M.B., and Jayaraman, V. (2010). Two-  
55 photon calcium imaging from head-fixed *Drosophila* during optomotor walking behavior. *Nat. Methods* 7, 535–  
56 540.
- 57 Serbe, E., Meier, M., Leonhardt, A., and Borst, A. (2016). Comprehensive Characterization of the Major  
58 Presynaptic Elements to the *Drosophila* OFF Motion Detector. *Neuron* 89, 829–841.
- 59 Serizawa, S., Miyamichi, K., Takeuchi, H., Yamagishi, Y., Suzuki, M., and Sakano, H. (2006). A neuronal  
60 identity code for the odorant receptor-specific and activity-dependent axon sorting. *Cell* 127, 1057–1069.
- 61 Sernagor, E., and Hennig, M.H. (2013). Retinal Waves. 1–12.
- 62 Seung, H.S., and Sümbül, U. (2014). Neuronal cell types and connectivity: lessons from the retina. *Neuron* 83,  
63 1262–1272.
- 64 Shatz, C.J., and Stryker, M.P. (1988). Prenatal tetrodotoxin infusion blocks segregation of retinogeniculate  
65 afferents. *Science* 242, 87–89.
- 66 Shinomiya, K., Karuppudurai, T., Lin, T.-Y., Lu, Z., Lee, C.-H., and Meinertzhagen, I.A. (2014). Candidate  
67 Neural Substrates for Off-Edge Motion Detection in *Drosophila*. *Curr. Biol.* 24, 1062–1070.
- 68 Sretavan, D.W., Shatz, C.J., and Stryker, M.P. (1988). Modification of retinal ganglion cell axon morphology  
69 by prenatal infusion of tetrodotoxin. *Nature* 336, 468–471.
- 70 Strother, J.A., Wu, S.-T., Wong, A.M., Nern, A., Rogers, E.M., Le, J.Q., Rubin, G.M., and Reiser, M.B. (2017).  
71 The Emergence of Directional Selectivity in the Visual Motion Pathway of *Drosophila*. *Neuron* 94, 168–  
72 182.e10.
- 73 Takemura, S., Karuppudurai, T., Ting, C.-Y., Lu, Z., Lee, C.-H., and Meinertzhagen, I.A. (2011). Cholinergic  
74 circuits integrate neighboring visual signals in a *Drosophila* motion detection pathway. *Curr. Biol.* CB 21,  
75 2077–2084.
- 76 Takemura, S., Bharioke, A., Lu, Z., Nern, A., Vitaladevuni, S., Rivlin, P.K., Katz, W.T., Olbris, D.J., Plaza,  
77 S.M., Winston, P., et al. (2013). A visual motion detection circuit suggested by *Drosophila* connectomics.  
78 *Nature* 500, 175–181.
- 79 Takemura, S., Nern, A., Chklovskii, D.B., Scheffer, L.K., Rubin, G.M., and Meinertzhagen, I.A. (2017). The  
80 comprehensive connectome of a neural substrate for “ON” motion detection in *Drosophila*. *eLife* 6.
- 81 Tan, L., Zhang, K.X., Pecot, M.Y., Nagarkar-Jaiswal, S., Lee, P.-T., Takemura, S.-Y., McEwen, J.M., Nern, A.,  
82 Xu, S., Tadros, W., et al. (2015). Ig Superfamily Ligand and Receptor Pairs Expressed in Synaptic Partners in  
83 *Drosophila*. *Cell* 163, 1756–1769.
- 84 Thimann, K.V., and Beadle, G.W. (1937). Development of the Eye Colors in *Drosophila*: Extraction of the  
85 Diffusible Substances Concerned. *Proc. Natl. Acad. Sci. U. S. A.* 23, 143–146.
- 86 Tritsch, N.X., Yi, E., Gale, J.E., Glowatzki, E., and Bergles, D.E. (2007). The origin of spontaneous activity in  
87 the developing auditory system. *Nature* 450, 50–55.
- 88 Tyssowski, K.M., DeStefino, N.R., Cho, J.-H., Dunn, C.J., Poston, R.G., Carty, C.E., Jones, R.D., Chang, S.M.,  
89 Romeo, P., Wurzelmann, M.K., et al. (2018). Different Neuronal Activity Patterns Induce Different Gene  
90 Expression Programs. *Neuron* 98, 530–546.e11.

- 91 Uhlén, P. (2004). Spectral analysis of calcium oscillations. *Sci. STKE 2004*, p115.
- 92 Vonhoff, F., and Keshishian, H. (2016). Cyclic nucleotide signaling is required during synaptic refinement at  
93 the *Drosophila* neuromuscular junction. *Dev. Neurobiol.* *77*, 39–60.
- 94 Watt, A.J., Cuntz, H., Mori, M., Nusser, Z., Sjöström, P.J., and Häusser, M. (2009). Traveling waves in  
95 developing cerebellar cortex mediated by asymmetrical Purkinje cell connectivity. *Nat. Neurosci.* *12*, 463–473.
- 96 Weir, P.T., Henze, M.J., Bleul, C., Baumann-Klausener, F., Labhart, T., and Dickinson, M.H. (2016).  
97 Anatomical Reconstruction and Functional Imaging Reveal an Ordered Array of Skylight Polarization Detectors  
98 in *Drosophila*. *J. Neurosci.* *36*, 5397–5404.
- 99 Zhang, K.X., Tan, L., Pellegrini, M., Zipursky, S.L., and McEwen, J.M. (2016). Rapid Changes in the  
00 Translatome during the Conversion of Growth Cones to Synaptic Terminals. *CellReports* *14*, 1258–1271.
- 01 Zheng, J., Lee, S., and Zhou, Z.J. (2006). A transient network of intrinsically bursting starburst cells underlies  
02 the generation of retinal waves. *Nat. Neurosci.* *9*, 363–371.
- 03 Zheng, J.-J., Lee, S., and Zhou, Z.J. (2004). A developmental switch in the excitability and function of the  
04 starburst network in the mammalian retina. *Neuron* *44*, 851–864.

## 05 **Figure Legends**

### 06 **Figure 1. Patterned stimulus independent neural activity (PSINA) in the developing visual system**

07 **A.** Micrograph montage showing a single cycle at 63 hAPF; framed panel (lower right) is the average intensity  
08 projection through the active phase. **B.** Representative cycle showing four sweeps (duration indicated in blue)  
09 during a shared active phase (green), and a shared silent phase (orange). **C.i.** Representative trace of a 2 hr  
10 interval during the periodic stage (50-65 hAPF). **C.ii.** Frequency analysis (Fourier transform) between 50-65  
11 hAPF; **C.iii.** Average traces of cycle metrics in the periodic stage (n = 54 ROIs from 6 flies). Shaded areas  
12 represent standard deviation. **D.i.** Representative trace during the turbulent stage (70 hAPF to eclosion); **D.ii.**  
13 Frequency analysis (Fourier transform) between 70-85 hAPF; **D.iii.** Average traces of cycle metrics in the  
14 turbulent stage (n = 46 ROIs from 4 flies), shaded areas represent standard deviation; **E.** Summary of  
15 spontaneous activity stages during pupal development. Black arrowhead marks the time point after which 100%  
16 of columns participate in each cycle. See Table S1 for genotypes used in this figure.  
17

### 18 **Figure 2. Characterization of PSINA**

19 **A.i.** Representative epifluorescence images of a single cycle in an intact pupa expressing pan-neuronal  
20 GCaMP6s. Brackets mark left optic lobe (blue), central brain (orange), and right optic lobe (green). **A.ii.**  
21 Average traces from ROIs encircling the left optic lobe (blue), central brain (orange), and right optic lobe  
22 (green) between 58-60 hAPF. **B.i.** Representative micrograph showing astrocytic glia expressing GCaMP6s  
23 (blue) and pan-neuronal expression of jRCaMP1b (orange). Scale bar, 40  $\mu$ m. **B.ii.** Representative trace  
24 comparing glial (blue) and neuronal activity from (orange) between 62-63 hAPF. Active phases of the neuronal  
25 cycles are shaded in gray. **C.** Representative traces (**i.**) and micrographs (**ii.**) from L1 neurons expressing  
26 jRCaMP1b (orange, top) and iGluSnFr (blue, bottom). Note that iGluSnFr reports more sweeps than  
27 jRCaMP1b; we suspect that this is due to the L1-expressed glutamate sensor's response to neurotransmitter  
28 released by L1 itself, neighboring cells or both. **D.** Representative traces (**i.**) and micrographs (**ii.**) from L1  
29 neurons expressing jRCaMP1b (orange, top) and ArcLight (blue, bottom). **E.** Representative traces of activity  
30 as reported by pan-neuronal GCaMP6s before (left) and after (right) addition of 1 $\mu$ M TTX. **F.i.** Micrographs of  
31 *norpA*<sup>null</sup> mutant flies expressing pan-neuronal GCaMP6s shows that visual stimuli are not required for activity  
32 to occur. See Table S1 for genotypes used in this figure.  
33

### 34 **Figure 3. Cell type specific PSINA dynamics**

35 **A.** Schematic of visual system cell types described in Figures 3 and 4; adapted from (Strother et al., 2017) **B.**  
36 Cycle metrics in the periodic stage, averaged over 15 cell types and 55 time series. Shaded areas, standard  
37 deviation. **C.** PSINA dynamics in L3 cells. **C.i.** Average intensity projection of GCaMP6s expressing L3  
38

39 processes in the M3 layer of the medulla neuropil. Single L3 schematically shown in red. Dashed yellow arrow  
40 sits below the thin profile through M3 used to generate the kymograph in (iii); direction matches the layout of  
41 the columns in the kymograph. **C.ii.** Average net fluorescence intensity along the profile described in (i). Active  
42 phase with gray background shown in greater detail in (iii). **C.iii.** Plot shows expanded view of an active phase  
43 with sweeps highlighted in light blue. Star marks the sweep expanded into individual column traces in (iv).  
44 Kymograph of net fluorescence derived from the profile described in (i). **C.iv.** Plot of fluorescence change in  
45 individual medulla columns in the star marked sweep in (iii). **D.** Same as (C) for an L1 time series. Kymograph  
46 generated from a thin profile through the L1 processes in M5 (i.e. layer just above the yellow line). **E.**  
47 Coordination (top) and coherence (bottom) values calculated for different cell types. Round gray markers are  
48 individual time series, black bars are the average for each cell type. Between two and six time series shown for  
49 each cell type. Metrics for each time series calculated over 55-65 hAPF, using an average of  $41 \pm 9$  cycles and  
50 10-20 columns per cycle. **F.** Scatter plot of coordination v. coherence. Vertices of light gray polygons,  
51 individual time series; black dots, average for each cell type. See Table S1 for genotypes used in this figure.

#### 53 **Figure 4. Synaptic release is required for correlated PSINA activity.**

54 **A.** Average intensity projection images of GCaMP6s expressing Tm3 (blue) and RCaMP1b expressing T4-5  
55 (orange) cells. Single Tm3, T4, and T5 projections are schematically shown in blue and orange. Dashed yellow  
56 arcs in center panel about the thin profiles through M9-10 and the lobula used to generate the kymographs in (B).  
57 **B.** Tm3-T4 (top) and Tm3-T5 (bottom) kymographs of net fluorescence derived from the profiles described in  
58 (A). Columns between the white brackets in active phase with gray background were used to generate the plots  
59 in (C). **C.** Tm3-T4 (**i**) and Tm3-T5 (**ii**) net fluorescence intensity along the columns marked in (B). **D.** 0-Lag  
60 cross correlation values between 55-65 hAPF for Tm3-T4 (dark gray) and Tm3-T5 (light gray) for the time  
61 series used in (A-C). Markers are the average correlation value for 10-20 columns per cycle, gray vertical lines  
62 are standard deviation. **E.** 0-lag correlation values for pairs of cell types, averaged over 55-65 hAPF. Black  
63 markers and vertical lines are the average and standard deviation for each time series. 2-3 time series shown per  
64 pair.  $43 \pm 10$  cycles with  $15 \pm 3$  columns per cycle used for each time series. The Tm3-Tm3 pair represents the  
65 highest correlation we expect to observe for a perfect match given the signal-to-noise statistics of the data (see  
66 Figures S6A-S6B). **F.** TNT expression in Tm3 reduces Tm3-T4 correlation but has no effect on Tm3-T5  
67 correlation. Data statistics as in (E). Unperturbed pairs reproduced from (E) for ease of comparison. See Table  
68 S1 for genotypes used in this figure.

#### 70 **Supplemental Information**

71 Supplemental Information includes seven figures, one table, and seven movies.

## 73 **STAR METHODS**

### 74 **Key Resources Table**

### 76 **Contact for Reagent and Resource Sharing**

77 Further information and requests for resources and reagents should be directed to and will be fulfilled by Orkun  
78 Akin.

### 80 **Experimental Model and Subject Details**

81 Flies were reared at 18°C or 25°C on standard cornmeal/molasses medium. Pupal development was staged with  
82 respect to white pre-pupa formation (0 hAPF) or head eversion (12 hAPF). The GAL4/UAS and LexA/LexAop  
83 expression systems (Brand and Perrimon, 1993; Lai and Lee, 2006) were used to drive cell type-specific  
84 transgene expression; complete genotypes used in each experiment can be found in Table S1.

### 86 **Method Details**

#### 87 **2P Imaging of the Developing Visual System**

88 Pupae were prepared for imaging as previously described (Akin and Zipursky, 2016). Briefly, the cuticle around  
89 the heads were removed with fine forceps and the animals were attached eye-down on a coverslip coated with a  
90 thin layer of embryo glue. A water reservoir on the objective side of the coverglass provided sufficient  
91 immersion medium to last through the hours-long imaging sessions; another reservoir below the pupae kept the  
92 animals from dehydrating.

93 Time-lapse imaging of the visual system was carried out on a custom-built 2P microscope (Akin and  
94 Zipursky, 2016) equipped with a 20x water immersion objective (Zeiss, W Plan-Apochromat 10x/1.0 DIC) and  
95 2 GaAsP detectors (Hamamatsu). Over the 2-24 hr imaging sessions, the pupae were kept at 25°C using an  
96 objective heater system (Bioptechs). A tunable Ti:Sapphire pulsed laser (Chameleon Ultra II, Coherent) was  
97 used as the light source. Green fluors were excited at 940 or 970 nm with ~30 mW under-the-objective power;  
98 1020 nm at ~60 mW was used for red fluors and two-color imaging. Animals imaged under these conditions  
99 developed normally and eclosed on schedule. To observe a thicker cross-section of the visual system than  
00 possible with a single optical slice, we used the maximum intensity projection of three successive images taken  
01 2 μm apart in the z-axis as the frame for an individual time point. Thus, the effective sampling rate of these time  
02 series was 0.4 Hz (2.5s per frame).

#### 03 **Wide-field Imaging**

04 Pupae were staged for head eversion and reared at 25°C. At 58-60 hAPF, pupae were affixed to a Sylgard 184  
05 Silicone Elastomer plate (Dow Corning) with double-stick adhesive tape (3M). Images were acquired with a

06 SteREO Discovery.V8 stereomicroscope (Zeiss) with illumination provided by an X-Cite Series 120PC light  
07 source (Excelitas) and captured on a Vixia HF R20 1/4.85 inch CMOS camera (Canon). Images were acquired  
08 at 30 Hz. Time series were processed with Fiji (ImageJ) (Schindelin et al., 2012) and analyzed using MATLAB  
09 (Mathworks, Natick, MA, USA).

### 10 **Adult Functional Imaging**

11 Calcium imaging was performed as previously described (Keleş and Frye, 2017). Briefly, a single fly was  
12 anesthetized at 4°C and placed into a chemically etched metal shim attached to a custom 3D-printed holder.  
13 Holder design was based on (Weir et al., 2016); details can be found at <http://ptweir.github.io/flyHolder/>. The  
14 head capsule and thorax were glued to the metal shim using a UV-curable glue ([www.esslinger.com](http://www.esslinger.com)). Legs and  
15 the antennae were immobilized using beeswax applied with a heated metal probe (Waxelectric-1, Renfert). The  
16 head capsule was bathed in saline (103mM NaCl, 3mM KCl, 1.5mM CaCl<sub>2</sub>, 4mM MgCl<sub>2</sub>, 26mM NaHCO<sub>3</sub>,  
17 1mM NaH<sub>2</sub>PO<sub>4</sub>, 10mM trehalose, 10mM glucose, 5mM TES, 2mM sucrose) and a small window was opened  
18 using fine forceps (Dumont, #5SF). Muscles and fat covering the optic lobe were cleared before placing the fly  
19 under a 2P microscope (3i, Denver, CO). Neurons expressing GCaMP6s were imaged at 920 nm using a  
20 Ti:Sapphire pulse laser (Chameleon Vision, Coherent). Images were acquired at 10 Hz.

21 An arena of 48 8x8 LED matrices (470 nm, Adafruit) was used to deliver the visual stimulus. Three  
22 layers of blue filter (Rosco no. 59 Indigo) were placed between the screen and the fly to eliminate leakage of the  
23 LED light into the PMTs. The screen extended  $\pm 108^\circ$  along the azimuth and  $\pm 72^\circ$  in elevation. Each LED pixel  
24 corresponded to a coverage of  $2.2^\circ$  on the retina equator. However, the projection of each pixel on the retina  
25 was variable due to the difference between the curvature of the eye and that of the screen. Visual stimulus  
26 consisted of a wide-field grating with a spatial frequency of  $35^\circ$  and presented at a temporal frequency of 0.62  
27 Hz in both directions (ipsi-to-contra and contra-to-ipsi) along the horizontal axis. The presentation order of the  
28 visual stimuli was randomized to prevent sensory adaptation. Each experimental condition was tested three to  
29 four times per animal.

### 30 **Tetrodotoxin Treatment**

31 Pupal development was staged for white pre-pupa formation and reared at 25°C. Between 90-95 hAPF, the  
32 pupal case was removed with fine forceps. These late pupae were prepared for imaging following the protocol  
33 described above for adult functional imaging. Viability was verified by leg or trachea movement. Neurons  
34 expressing GCaMP6s were imaged at 920 nm using a Ti:Sapphire pulsed laser (Chameleon Vision, Coherent).  
35 Images were acquired at 10 Hz.

36 Tetrodotoxin at 1 $\mu$ M final concentration was mixed into the saline solution after 40 minutes of imaging  
37 and the fly was observed for another 20 minutes after the application of the drug. Viability was confirmed  
38 before and after tetrodotoxin administration, and the data were excluded from analysis if the animal did not  
39 survive the experiment.



## 40 **Visual Flight Simulator**

41 Flies were cold anesthetized at 4°C, tethered to tungsten pins using UV activated glue, and allowed to recover  
42 for 1-2 hours in a small, humidified acrylic container with a red desk lamp providing heat. This recovery regime  
43 improves flight performance consistency. The majority of the experiments were performed in the afternoon  
44 when flies are most active.

45 A visual flight simulator composed of 32x96 cylindrical green (570 nm) LEDs was used to deliver  
46 visual stimuli (Reiser and Dickinson, 2008). The arena covered  $\pm 180^\circ$  along the azimuth and  $\pm 60^\circ$  in  
47 elevation. Single flies were positioned in the center of the arena and illuminated from above with an 880 nm  
48 infrared LED. The shadow cast by the wings was detected with an optical sensor. Signal from this sensor was  
49 analyzed by an instrument called the wingbeat analyzer (JFI Electronics Laboratory, University of  
50 Chicago, Chicago, IL, USA) that calculates left and right wing beat amplitudes (WBA). The difference in the  
51 left and right WBA is proportional to the fly's steering effort in the yaw axis.

52 For bar fixation closed-loop experiments, a dark bar that is  $120^\circ$  in height and  $30^\circ$  in width was  
53 presented to the flies. Positional displacement of the bar in the yaw axis was coupled to the steering effort of the  
54 fly, allowing the animal to have the active control of the bar position. Each fly was tested for closed-loop  
55 fixation behavior for four minutes. To test open-loop optomotor responses, flies were presented with wide-field  
56 gratings with a spatial frequency of  $30^\circ$  and a temporal frequency of 3 Hz for four seconds.

## 58 **Quantification and Statistical Analysis**

### 59 **Analysis of Pupal Imaging Data**

60 *Pre-processing:* Processing and analysis of image data were carried out with custom scripts written in  
61 MATLAB (Mathworks, Natick, MA, USA). Fiji (ImageJ) was used for some user-assisted tasks and figure  
62 preparation. Time series were processed in blocks corresponding to ~6 hours of observation (~9000 frames). In  
63 the pre-processing step of reducing lateral motion, the general approach of maximizing the cross correlation of  
64 individual frames to a reference image was modified to meet the specific challenges of developmental imaging.  
65 First, a series of reference images were generated as averages of pools of high signal frames distributed across  
66 each block. After ~55 hAPF, the optic lobes begin to twitch with a period similar to that of PSINA. These fast  
67 movements can introduce significant blur into the pool-averaged reference images. To reduce this blur, 300  
68 random subsets of each pool were tested to find the sharpest average reference image. Sequential registration of  
69 this series of reference images to each other produced a stabilized representation of the visual system which  
70 continues to move and grow over the course of observation (Akin and Zipursky, 2016; Langen et al., 2015). In a  
71 second step, the registration of the reference series was refined to minimize the movement of a user defined  
72 region of interest (ROI). These internally registered reference images then served as local registration targets for  
73 nearby frames of the full block. Finally, the block was corrected for any rotational motion of the ROI.

74 *Signal and Feature Extraction:* Per frame pixel averages of masked regions were used to define raw signal (F)  
75 traces from the image time series. Time-dependent fluorescence baseline ( $F_0$ ) was estimated using a moving  
76 window approach and used to calculate the net signal ( $F-F_0$ , Figures 3 and 4) and change-in-signal  $((F-F_0)/F_0$ ,  
77 Figures 1 and 2) traces. User-defined, static masks were used for pan-neuronal and glial expression  
78 experiments. For cell type-specific experiments, *dynamic masks*, corresponding to the active columns in each  
79 cycle, were defined automatically from the kymograph representation of the time series. Briefly, kymographs  
80 were generated as concatenated line profiles from user-defined, segmented arcs of 7-9 pixel (3-4  $\mu\text{m}$ ) thickness,  
81 drawn across a single layer of the medulla or lobula neuropil. Baseline subtracted, net signal kymographs were  
82 used in all subsequent analysis. Projecting along the spatial dimension of the kymographs yielded one  
83 dimensional net signal traces, which were used to identify the limits of PSINA cycles. Within each active phase,  
84 sweeps were defined by ordering intensity peaks with respect to their amplitudes, and, from the largest peak on  
85 down, marking the continuous time spans with net signal intensity greater than 75% of peak value; lesser peaks  
86 present in the sweep of a larger one were removed from the ordered peak list used in sweep identification.  
87 Dynamic masks were based on peaks in the *activity profiles* of PSINA cycles, produced for each active phase  
88 by projecting along the temporal dimension of the kymographs. The width of each mask was determined by  
89 testing the spatial neighborhood of each peak for correlated net intensity changes in the time domain. The  
90 maximum number of dynamic masks identified in each cycle was set to 20.

91 *Frequency Analysis:* Analysis was implemented in MATLAB, following the guidelines of Uhlen (Uhlén, 2004).  
92 Change-in-signal ( $\Delta F/F$ ) traces were processed using a 2-hour sliding window which traversed the time series in  
93 1-hour steps. After filtering with a Hanning window to reduce spectral leakage, each 2-hour block was  
94 transformed with the FFT algorithm to obtain non-parametric power spectrum density estimates. The fidelity of  
95 the power spectrum density estimate was confirmed by applying the inverse transform on the highest-power  
96 peak and comparing the resultant signal to the raw data. One-sided power spectrum density estimates were  
97 plotted for each 2-hour block in Figure 1 and Figure S2.

98 *PSINA Dynamics:* For each cycle, unit signal-to-noise (S2N) value was defined as twice the standard deviation  
99 of the net signal trace in the silent phase. A dynamically masked column was considered to participate in a  
00 given sweep if it had a net intensity peak greater than or equal to 1.0 S2N within the sweep limits. This scoring  
01 scheme was the basis of the definition of the coordination metric. For coherence, the largest fraction of columns  
02 that reach peak intensity at the same time point within each sweep was calculated. To ensure consistent  
03 comparisons across different cell types, only high participation ( $\geq 90\%$ ) sweeps were considered for the  
04 coherence metric.

05 *Correlation Analysis:* For the analysis of two-color imaging experiments, two separate kymographs were  
06 generated using the same segmented arc. Dynamic masks were derived from the average activity profile of  
07 these two kymographs to ensure that the masks captured columns active in both channels. Cycle limits were

determined using the brighter channel. For each cycle, masks with a maximum S2N value of at least 1.0 in both channels were used to calculate pairwise 0-lag cross-correlation. Cycles with fewer than 10 masks above the signal quality threshold were excluded in the calculation of time series ensemble statistics (i.e. mean and standard deviation.)

### **Analysis of Adult Calcium Imaging Data**

Images were pre-processed to correct for lateral motion using the registration algorithm described above. To find active pixels in the lobula, we defined a mask excluding other neuropils (medulla and lobula plate). For every pixel in this mask, the mean value and standard deviation were calculated for the full time series; the test value for each pixel was defined as the product of these metrics. Pixels with test values greater than or equal to twice the mean value of all pixels in the mask were used in analysis. In our experience, this thresholding approach enriches for active pixels over background and shot noise in the selected mask. The frame average of active pixels were used to produce the signal trace for the time series. Repeated observations were averaged for each fly and a single average trace per experiment was generated.

### **Analysis of Visual Fixation Behavior**

Behavioral data from the visual display and the wing beat analyzer was collected with a Digidata 1440A digitizer (Molecular Devices, San Jose, CA, USA) sampled at 1 kHz. Data were processed using custom written scripts in MATLAB (Mathworks, Natick, MA, USA). Briefly, the first 100 milliseconds of the trials were removed and the first data point of the remaining signal was subtracted from the entire trial to set the initial WBA to zero. Delta WBA was calculated by subtracting left from right WBA. Flies which stopped flying during the experiments were excluded from further analysis. Trials for the same experimental conditions were averaged and calculated for all animals. No statistical tests were conducted to pre-determine the sample size. To analyze closed-loop fixation data, the bar position was binned into 96 positions around the visual azimuth and bar histograms for each fly was calculated. Data were then averaged across the animals for the time bar spent at each position.

### **Data and Software Availability**

Scripts developed by the authors and used in this study are available upon request.

# Figure 1

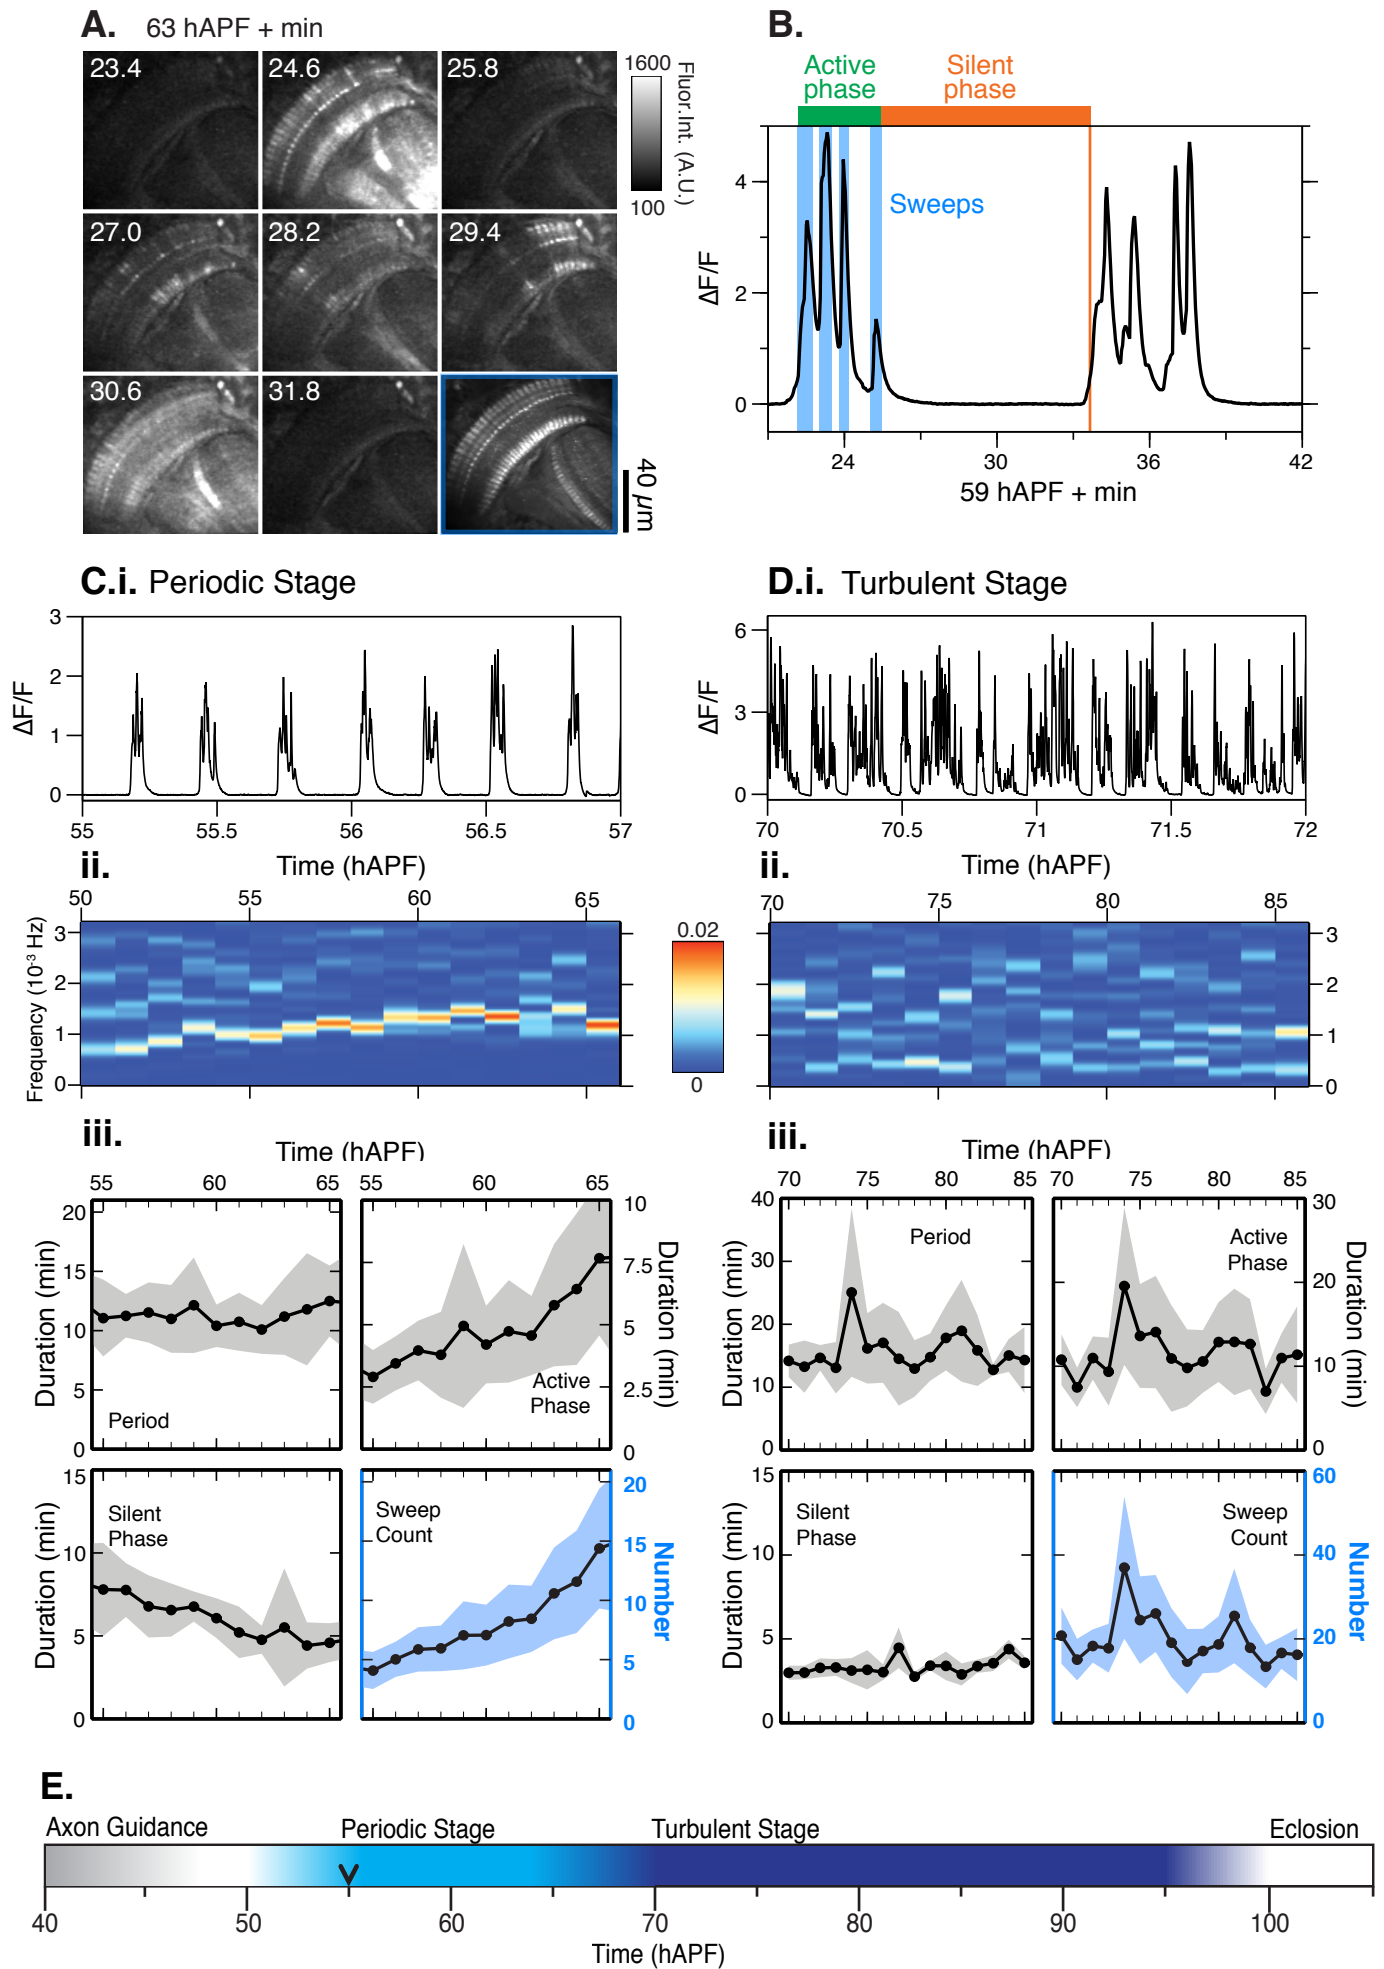

## Figure 2

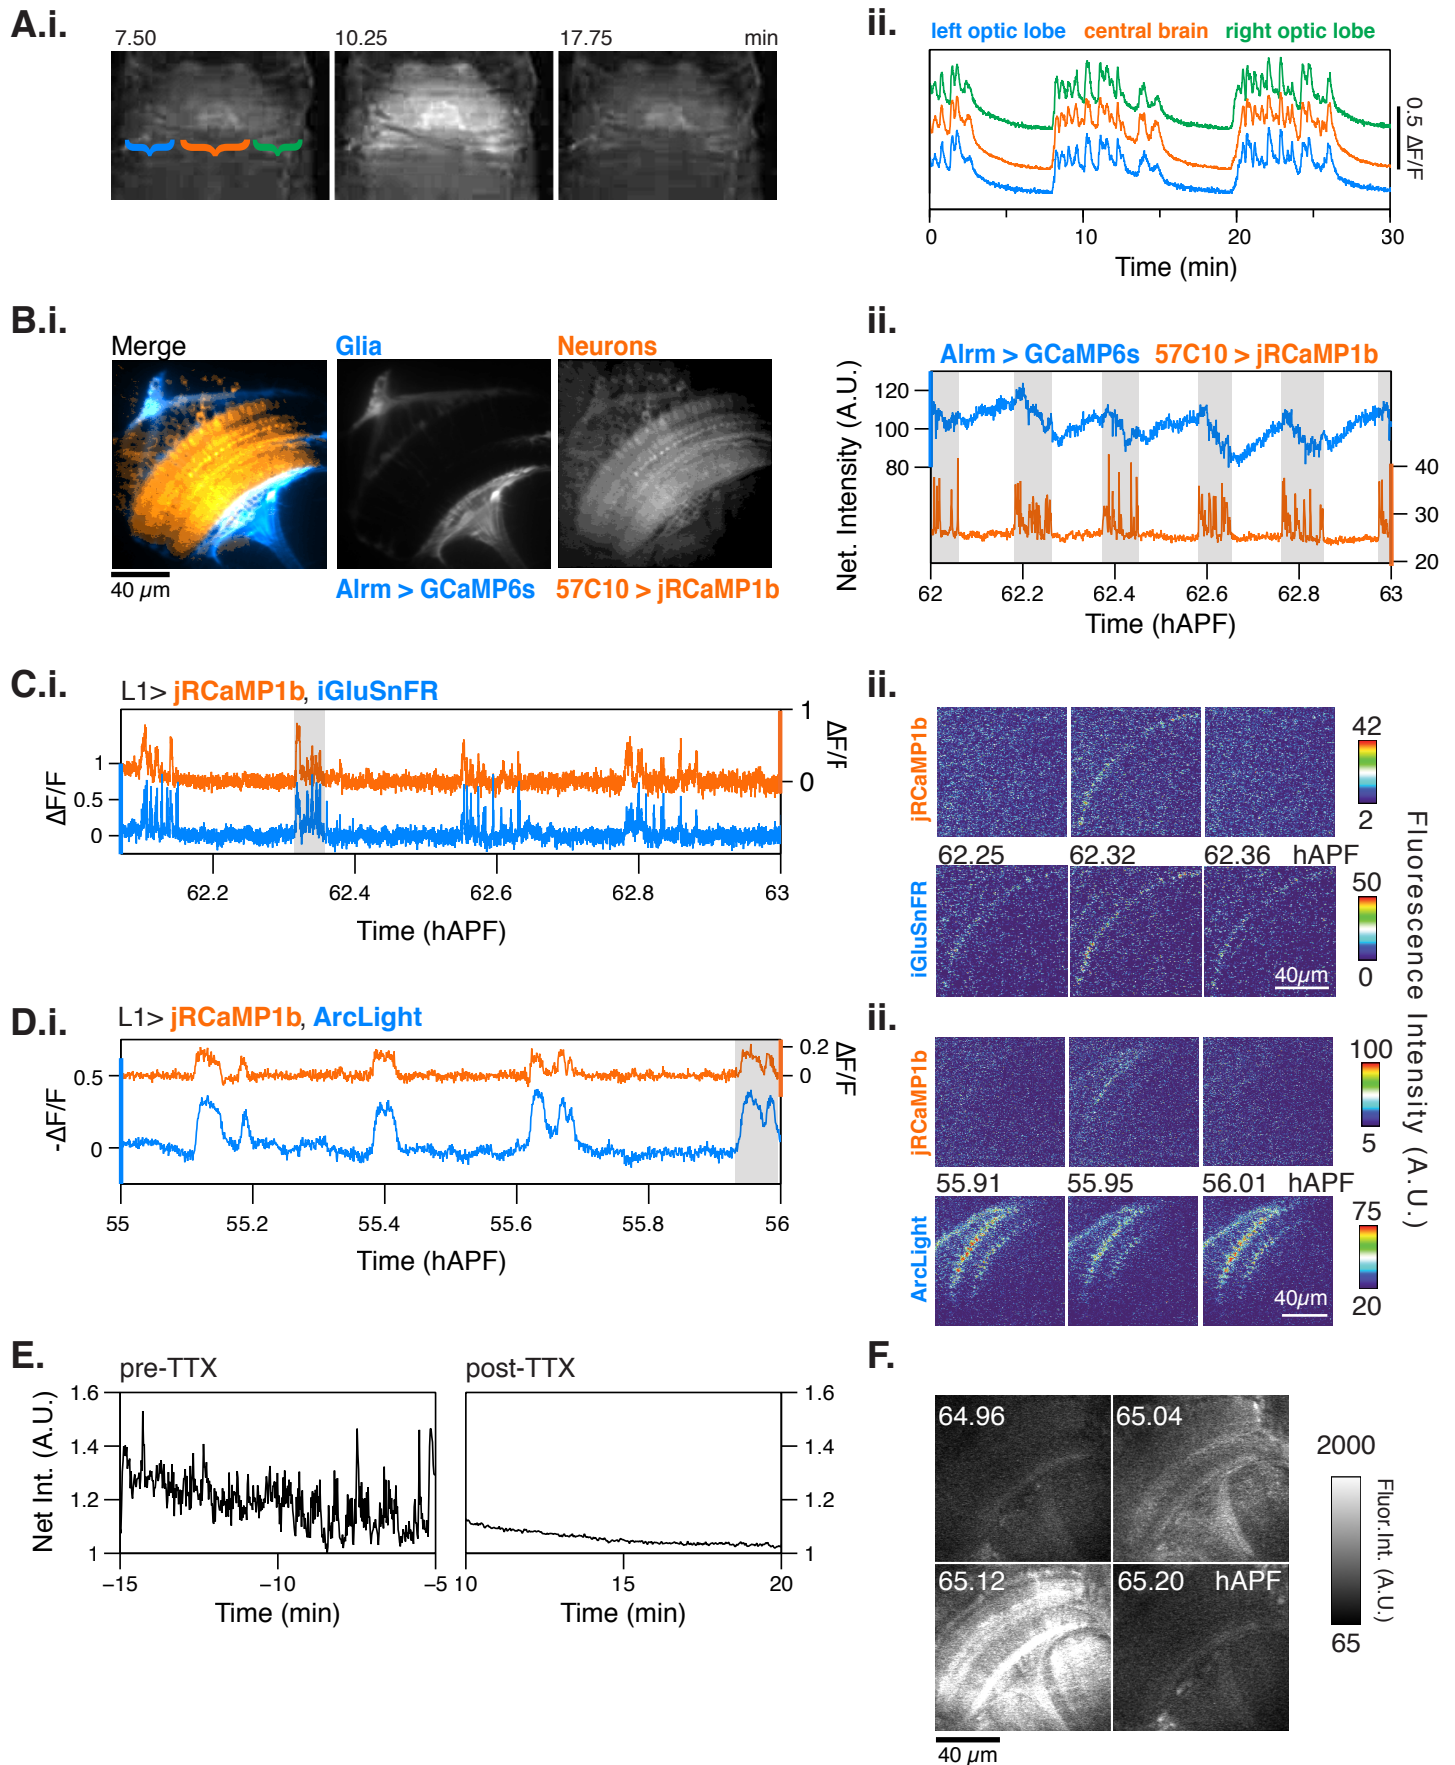



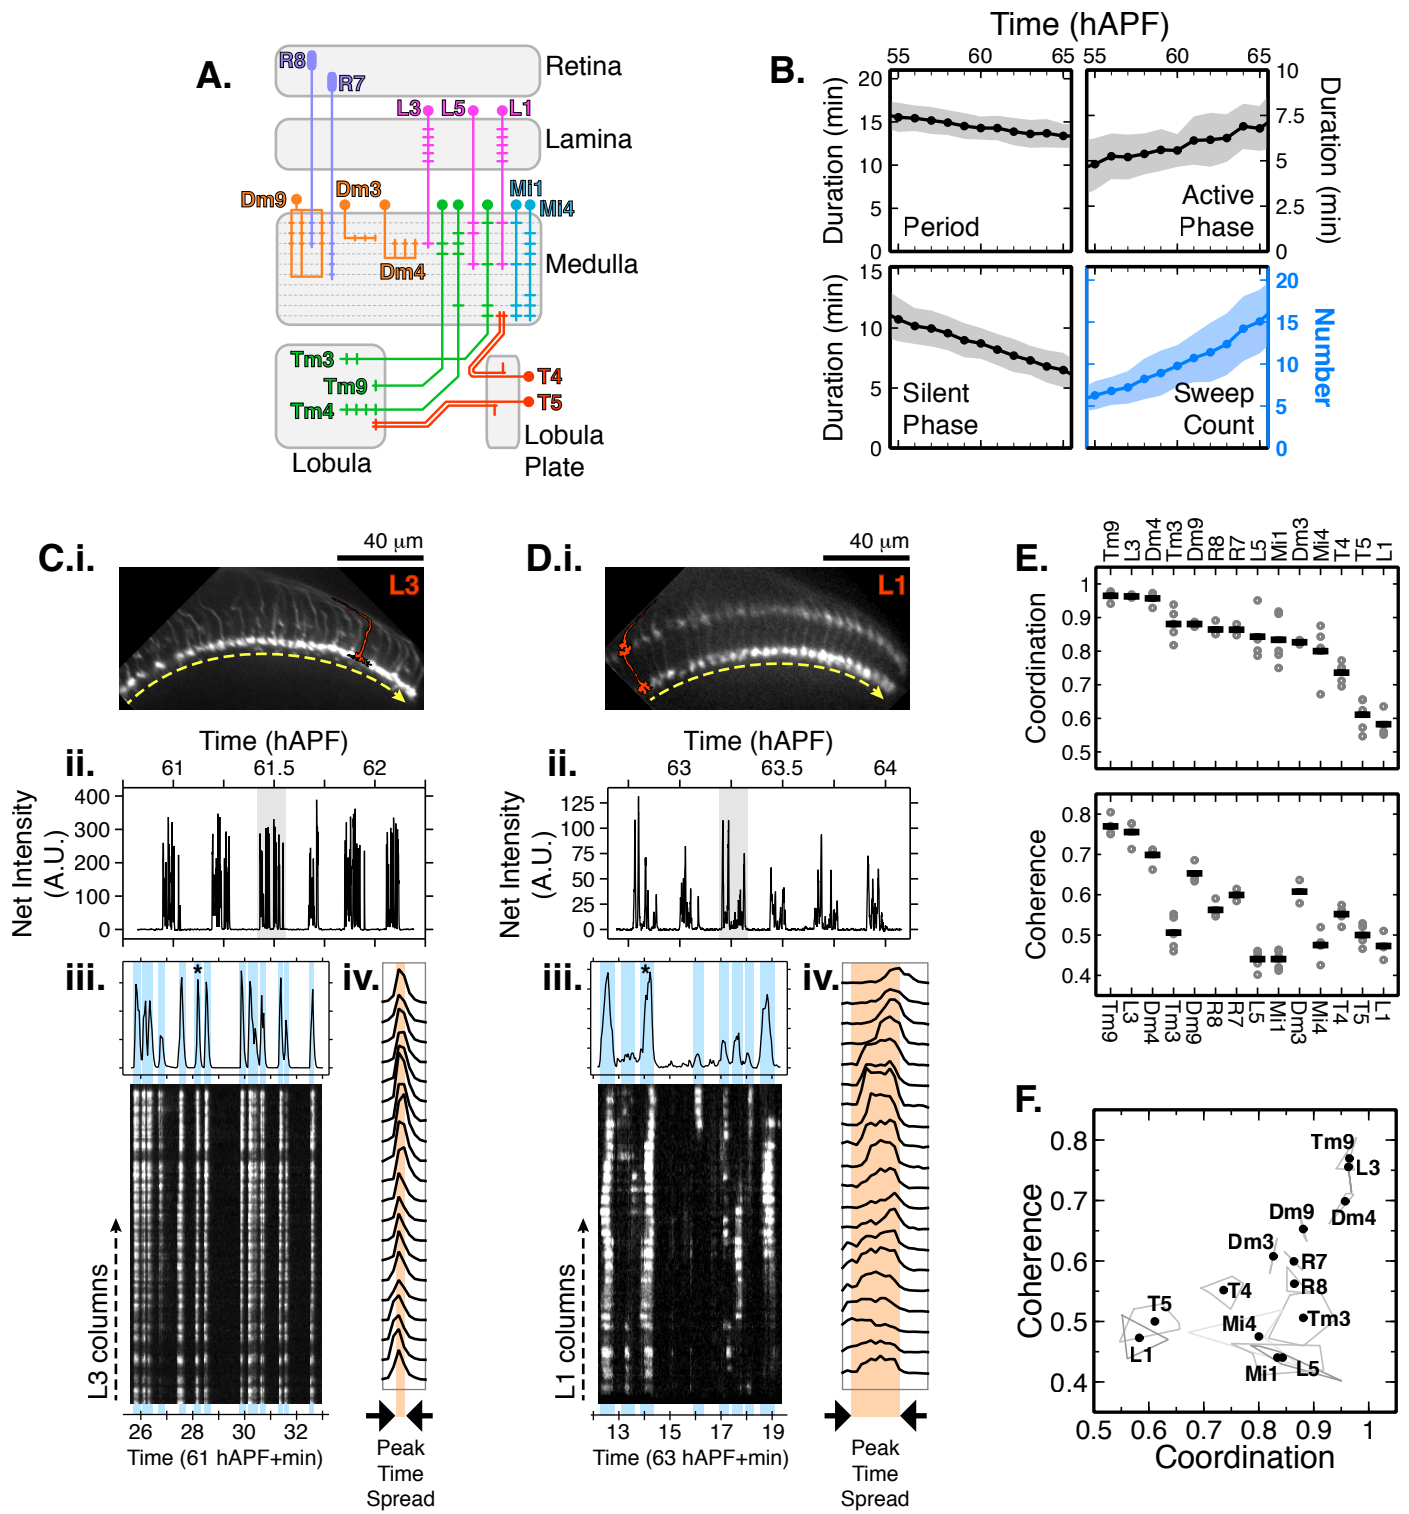



**Figure 4**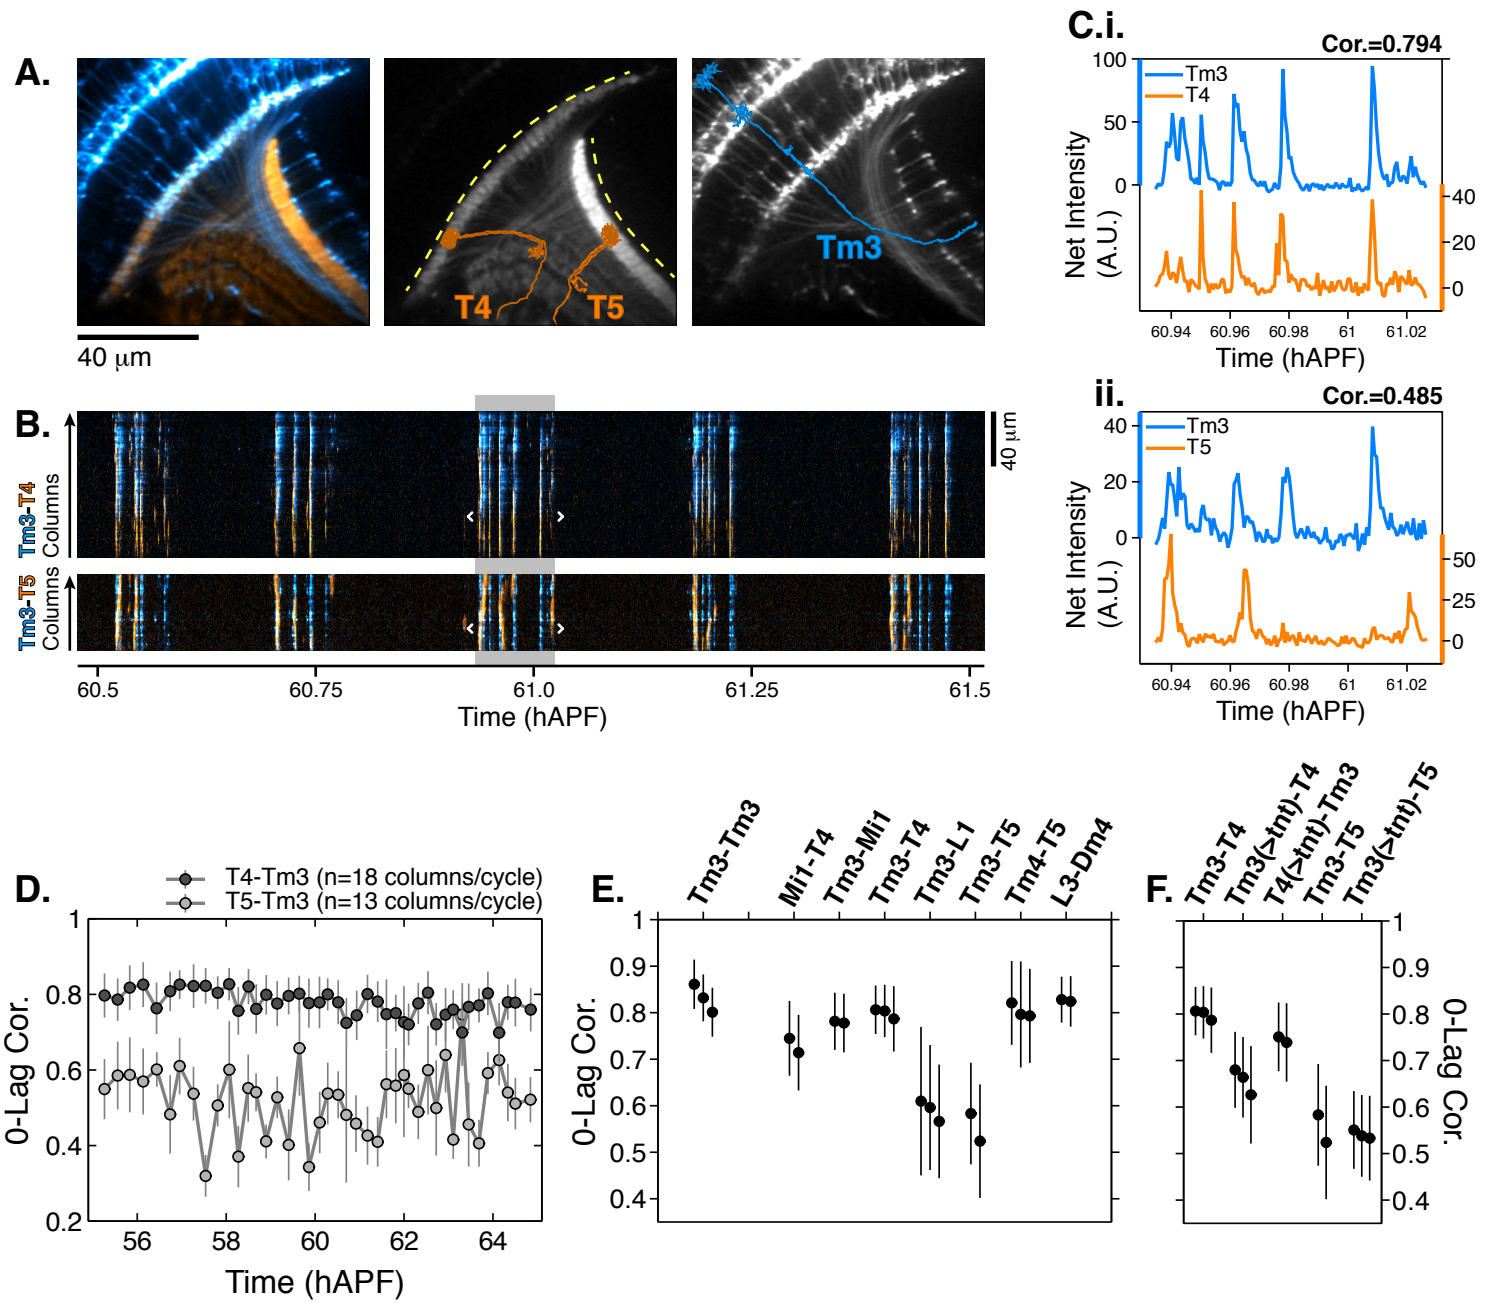

Source: https://www.biorxiv.org/content/10.1101/376871v1.full.pdf
